# Supplementary material for: Association of time-averaged serum uric acid level with clinicopathological information and long-term outcomes in patients with IgA nephropathy
Source: PeerJ. 2024 Apr 19;12:e17266. doi: 10.7717/peerj.17266 (PMC11034505; doi:10.7717/peerj.17266)
Supplement: Dataset S1 [file peerj-12-17266-s002.xlsx]

## Sheet: peerj-92668-dataset
age	hematuria	TimeAverageHematuria	TimeAverageUricaAcid	UrinaryAalbumin	Urinep Protein Remission（1：yse；0：no）	RenalSurvivalTime	ESRD（2：yse；1：no）	DScr（2：yse；1：no）	albumin	TimeAverageAlbumin	gender（1：male；2：female）	hypertension（1：yse；0：no）	diabete（2：yse；1：no）	ACEI/ARB（2：yse；1：no）	hormone（2：yse；1：no）	Immune Inhibitor（2：yse；1：no）	HB	BUN	SCr	UricaAcid	FastingBbloodGlucose	TC	triglyceride	eGFR	IgGgL	IgAgL	IgMgL	c3gL	c4gL	M1	S1	E1	T1andT2	C12	IgA	A	IgM	M	IgG	G	C3	c3_A	C1q	c1q_A
63	1	142	377.133	1.54	0	31	1	1	36.4	37.6	1	1	1	1	2	1	120	3.74	62.5	366.4	5.98	4.93	1.45	91.1	7.81	3.15	1.74	0.97	0.22	1	1	0	0	0	3	1	0	0	0	0	2	1	0	0
43	0	81.79	454.9	1.7	0	31	1	1	38.6	40.35	2	1	2	1	1	2	157	6.93	125.1	554.8	4.25	6.25	6.53	60.3	10.5	2.57	0.95	1.06	0.29	1	1	0	1	1	4	1	0	0	0	0	3	1	0	0
54	1	66.59	375.567	0.83	1	31	1	1	36.8	38.95	1	0	2	1	2	2	118	5.14	67.9	374.7	4.5	4.87	0.83	87.8	12.1	3.73	0.59	0.81	0.25	1	1	1	0	0	4	1	1	1	0	0	4	1	0	0
39	0	51.15	244.8	1.36	0	31	1	1	36.2	36.1	1	0	2	1	1	2	143	2.8	49	287.4	3.67	5.91	1.84	117.9	7.95	2.41	1	0.81	0.17	1	1	0	0	0	4	1	1	1	0	0	1	1	0	0
54	1	714.2	359.92	1.79	1	31	1	1	34.5	35.6	1	1	2	1	2	2	111	7.16	143.2	354.6	5.32	6.01	2.71	35.6	9.86	2.1	1.37	1.21	0.25	1	1	0	0	1	4	1	0	0	0	0	4	1	0	0
29	0	2.97333	286.433	0.86	0	31	1	1	34.2	38.1	1	1	2	1	2	2	136	8.34	62.6	366.3	4.72	9.25	2.41	115.5	0.72	2.74	1.66	1.12	0.37	1	1	0	0	0	4	1	0	0	0	0	2	1	0	0
72	0	7.6	615.9	0.89	0	31	1	1	31.9	32.45	1	1	2	1	2	2	125	6.79	102.7	596.8	5.48	5.52	2.25	46.9	13.9	3.26	0.53	0.87	0.27	0	0	0	0	0	3	1	0	0	0	0	3	1	0	0
22	1	462.65	401.7	2.09	0	31	1	1	37.3	39.15	1	0	2	2	1	1	112	4	67.1	406.4	4.54	5.02	1.09	111.5	9.51	3.73	3.39	0.76	0.15	1	0	1	0	1	4	1	4	1	0	0	4	1	0	0
31	0	109.333	409.533	4.4	1	31	1	1	35.8	35.9	2	1	2	1	2	2	123	9.97	170.3	578.6	4.82	6.34	1.92	45.2	5.26	2.45	1.14	0.94	0.29	0	1	0	1	1	4	1	4	1	0	0	4	1	0	0
47	0	108	362.7	0.24	1	32	1	1	40.9	40.95	2	0	2	2	2	2	122	7.1	127.8	364.8	5.28	4.71	2.47	57.1	11.8	2.04	0.64	0.91	0.21	1	1	0	0	1	4	1	2	1	0	0	4	1	0	0
70	0	1.61	448.7	1	1	32	1	1	34.7	34.7	2	1	2	1	2	2	93	7.74	146.7	447.4	6.19	3.37	4.7	41.2	15.5	3.09	0.45	0.85	0.19	1	1	1	0	0	4	1	4	1	0	0	4	1	0	0
28	0	26.82	332.25	0.3	1	32	1	1	42.2	39.35	1	0	2	2	2	2	119	5.58	52.8	378.5	4.56	4.64	0.49	124.2	15.6	4.35	2.98	0.67	0.12	1	0	0	0	0	4	1	3	1	0	0	4	1	0	0
39	1	411	385.1	0.99	0	32	1	1	44.4	45.7	2	1	2	1	2	2	119	7.29	98.2	378.3	4.39	4.14	4.17	83.1	8.65	2.39	0.65	0.81	0.21	0	0	1	0	0	4	1	2	1	0	0	3	1	0	0
26	1	11.428	258	0.24	1	32	1	1	41.5	42.95	1	0	2	2	2	2	139	6.18	47.4	300	6.18	4.43	0.45	130.5	12.3	2.91	1.09	0.81	0.25	1	1	0	0	1	4	1	0	0	0	0	3	1	0	0
28	1	155.093	339.2	9.77	1	31	1	1	27	36.5	1	0	2	2	2	2	131	3.77	64	455.6	5.22	5.53	1.03	113.2	6.83	3.13	1.86	0.68	0.13	1	1	0	0	1	4	1	4	1	0	0	4	1	0	0
56	0	28	410.65	1.94	1	32	1	1	32	37.2	1	1	2	1	2	2	109	7.58	82.6	377.6	4.75	5.09	1.28	68.53	7.74	3.57	0.31	0.76	0.18	1	0	0	1	0	4	1	3	1	0	0	4	1	2	1
42	0	73.56	355.88	0.29	1	34	1	1	48.5	47.1	1	1	2	1	2	2	68	4.8	94.9	381.4	4.3	4	1.22	63.7	16.4	1.93	1.58	0.96	0.2	1	1	1	1	0	4	1	4	1	0	0	0	0	1	1
49	0	38.0333	429.883	0.52	1	34	1	1	38.8	41.9	2	0	2	2	2	2	119	5.41	125.2	451.3	4.61	3.41	0.66	57.8	13.3	4.18	1.12	0.67	0.17	1	1	1	1	0	4	1	1	1	0	0	4	1	0	0
26	0	89.1667	469.833	5.21	1	35	1	1	32.8	37.15	1	0	2	1	2	2	120	5.05	80.7	510.5	4.21	7.53	2.27	86.7	8.45	3.07	0.94	1.1	0.31	1	1	0	1	1	4	1	2	1	0	0	4	1	0	0
30	0	45.9	408.586	0.77	1	35	1	1	39.5	41.65	2	0	2	1	2	2	160	5.57	93.6	419.1	4.01	3.98	1.86	93.8	9.51	2.86	1.17	1.2	0.21	1	1	1	0	0	4	1	4	1	0	0	3	1	0	0
25	1	261.25	244.5	0.62	1	35	1	1	34.1	36.4	1	0	2	2	2	2	127	4.3	56	259	3.53	8.04	0.94	124.4	12.5	2.41	1.51	0.61	0.14	0	0	0	0	1	4	1	0	0	0	0	4	1	0	0
23	1	194.714	258	0.31	1	35	1	1	40.1	42.55	1	0	2	2	2	2	124	4.8	51	249	4.25	4.75	1.39	130.1	8.97	1.05	1.58	0.67	0.08	0	1	0	0	1	1	1	2	1	0	0	2	1	1	1
20	0	160.2	425.333	0.72	1	35	1	1	46.3	47.35	2	1	2	1	2	2	146	3.68	67	335	3.82	2.94	0.67	131.5	11.2	3.46	1.27	0.77	0.17	0	0	0	0	0	2	1	4	1	0	0	4	1	0	0
27	0	9.03333	343.5	8.06	1	36	1	1	19.6	32.3	2	0	2	1	1	2	171	3.9	80	320	3.62	16.01	2.3	115.9	3.83	4.19	1.98	1.4	0.25	0	0	1	0	0	3	1	0	0	0	0	0	0	0	0
56	0	26	391	0.19	1	36	1	1	42.4	43.2	2	1	2	1	2	2	152	5.75	75	391	6.39	5.49	2.57	97.5	7.97	2.86	1.06	0.75	0.25	0	1	0	0	0	4	1	0	0	0	0	3	1	0	0
31	1	127.833	366.4	1.75	1	36	1	1	38.7	41.05	2	1	2	1	1	1	121	6	191	515	4.23	4.28	1.22	39.3	12.7	3.85	0.76	0.76	0.18	1	1	0	1	1	4	1	0	0	0	0	4	1	0	0
30	0	6.5	500.667	0.95	0	37	1	1	42.3	46.2	2	1	2	1	2	2	174	7.01	112	419	3.72	4.89	3.23	75.5	12.5	2.89	0.93	1.1	0.23	1	1	1	1	0	4	1	3	1	0	0	0	0	0	0
28	0	4.45333	317	1.66	1	37	1	1	39.4	42.15	1	0	2	2	2	2	138	3.86	61	326	4.62	6.41	1.4	118.5	8.63	1.08	3.91	0.89	0.2	1	1	0	0	1	4	1	3	1	0	0	3	1	0	0
18	1	556	243	1.2	0	37	1	1	32.8	35.9	1	0	2	2	2	2	130	4.9	66	249	3.94	5.33	1.32	117	12.1	2.15	1.4	0.65	0.32	1	1	1	0	1	1	1	1	1	0	0	1	1	0	0
50	0	1.15	417	0.29	1	37	1	1	37.9	40.95	1	1	2	1	2	2	114	3.8	96	417	3.99	3.61	1.11	59.4	15.8	3.78	1.25	0.73	0.4	0	0	1	1	0	3	1	3	1	0	0	4	1	0	0
18	1	45.8333	466.8	2.21	1	38	1	1	39.6	43.85	2	1	2	1	1	2	150	4.7	99	636	3.74	5.18	2.13	95.4	9.13	4.45	0.35	1.01	0.28	1	1	0	0	0	4	1	0	0	3	1	3	1	0	0
29	0	13.3333	346.4	1.89	1	38	1	1	47.4	48.55	2	0	2	2	2	2	141	5.8	85	556	4.82	5.98	10.85	106.2	9.63	1.48	0.96	0.63	0.2	1	1	0	1	1	4	1	0	0	0	0	3	1	0	0
56	0	25	412.167	3.96	1	38	1	1	32.4	38.15	2	1	2	1	2	2	96	9.6	141	491	4.13	3.96	1.58	47.6	4.31	2.58	0.77	1.31	0.27	1	1	0	1	1	4	1	0	0	0	0	0	0	0	0
57	1	193.129	285.5	0.45	1	39	1	1	39.7	42.55	1	1	2	1	2	2	126	3.4	55	260	4.13	4.89	0.73	100	9.75	1.76	1.77	0.73	0.15	1	1	0	0	0	4	1	4	1	0	0	3	1	0	0
52	0	3.96667	409.667	0.94	0	39	1	1	37.8	41.55	2	0	2	1	2	2	139	5.7	97	422	5.09	3.55	1.27	77	13.9	#NULL!	0.93	0.94	0.28	0	1	1	0	0	3	1	2	1	0	0	0	0	0	0
22	0	0.825	405	4.2	0	40	1	1	15.6	21.6	2	0	2	1	1	2	140	9.84	109	447	5.45	10.92	1.87	82.6	4.52	3.71	1.67	1.06	0.27	0	0	1	0	0	3	1	2	1	0	0	1	1	1	1
30	0	5.65333	282.667	0.15	1	40	1	1	31.4	40.7	2	0	2	2	2	2	154	3.8	54	299	4.73	3.13	0.97	133.9	9.74	3.01	1.35	1.25	0.19	0	0	0	0	0	3	1	2	1	0	0	1	1	0	0
35	1	109	368	0.12	0	40	1	1	27.2	35.7	1	0	2	2	2	2	107	4.25	75	342	4.68	4.16	0.65	89	7.5	2.65	1.5	0.72	0.17	1	1	1	0	0	4	1	3	1	0	0	4	1	0	0
45	0	43	330.25	0.3	0	40	1	1	36.5	41	2	1	2	2	2	2	179	6	83	554	3.3	4.54	1.26	97.7	11.3	3.51	1.18	0.8	0.24	1	1	0	0	0	4	1	3	1	0	0	3	1	0	0
30	1	250.5	451.429	3.31	0	41	2	2	37.5	33.95	2	1	2	1	2	2	107	18.8	209	420	5.18	5.25	3.26	35.5	12.6	3.6	0.63	0.74	0.3	1	1	1	1	1	4	1	2	1	2	1	4	1	0	0
39	0	4.575	270	0.1	0	42	1	1	44.6	41.4	2	0	2	2	2	2	147	4.97	90	260	3.81	5.06	1.45	92.4	12.5	2.8	0.86	0.68	0.28	1	0	1	0	0	2	1	2	1	0	0	0	0	0	0
31	0	3.2	408.833	1.1	0	42	1	1	41.5	42.7	1	1	2	1	2	2	141	8.1	120	385	4.12	6.31	1.11	51.8	13.4	2.45	1.62	0.67	0.18	1	1	0	1	0	1	1	0	0	0	0	0	0	0	0
27	0	31.45	408.2	2.32	0	42	1	1	38	38.85	2	0	2	2	1	1	95	15.5	281	592	4.31	5.98	2.17	25.4	15	6.47	0.88	1.31	0.34	0	1	1	1	1	3	1	2	1	0	0	4	1	0	0
55	0	33.7	365.143	2.88	0	42	1	1	31.8	34.7	1	1	2	1	2	2	108	11.1	157	443	5.63	6.1	2.58	31.6	9.81	4.5	0.92	0.94	0.29	0	1	0	1	0	3	1	0	0	0	0	4	1	0	0
44	0	25.42	551.167	1.42	1	43	1	1	44.3	45.15	2	1	2	1	2	2	137	6.33	156	658	4.74	1.93	1.93	45.9	9.67	4.9	0.47	1.14	0.28	0	1	0	1	1	4	1	4	1	0	0	3	1	0	0
48	0	5.424	486	0.38	0	43	1	1	37	39.5	2	1	2	1	2	2	150	6.8	98	479	4.12	3.73	1.37	78.2	12.3	3.2	1.15	0.67	0.16	0	1	1	0	0	3	1	2	1	0	0	1	1	0	0
30	0	90.375	419.6	0.9	0	43	1	1	38.6	42.25	2	0	2	2	2	2	141	4.01	114	470	4.22	3.57	0.9	73.9	11.7	5.67	0.8	1	0.2	1	1	0	0	0	4	1	1	1	0	0	3	1	0	0
23	0	1.852	327.5	0.81	1	43	1	1	34.2	40.6	2	1	2	1	2	2	109	5.6	105	199	4.31	4.92	0.42	85.8	12.8	4.3	0.7	1	0.18	1	1	0	1	0	3	1	2	1	0	0	0	0	0	0
42	0	17.1667	424.6	1.1	1	44	1	1	45.8	45.9	2	1	2	2	2	2	146	8	164	410	4.63	5.54	1.63	43.8	11.9	3.47	1.01	0.9	0.28	1	1	1	1	0	4	1	3	1	0	0	4	1	0	0
43	0	73.4286	456.167	1.07	0	44	1	1	36.8	38.95	2	0	2	2	2	2	150	7.83	110	513	3.9	5.08	0.94	70.5	9.92	2.91	1.82	1.33	0.37	1	1	1	0	0	3	1	3	1	0	0	4	1	0	0
24	0	73.5	374.25	0.81	1	44	1	1	45.9	44.45	2	0	2	2	2	2	145	4.6	80	396	4.44	3.85	0.84	118.3	12.3	4.35	0.51	0.94	0.2	1	1	0	0	1	4	1	2	1	0	0	3	1	0	0
50	0	39.3333	500.2	2.32	1	24	2	2	33	36	2	1	2	1	1	2	122	13.15	221	513	4.28	3.82	0.73	28.9	12.2	4.27	1.59	0.76	0.16	1	1	1	1	0	3	1	4	1	0	0	4	1	0	0
34	0	2.075	374	0.68	1	44	1	1	48.1	45.55	1	1	1	2	2	2	130	7.4	42	427	5.76	4.05	2.19	128.4	13.3	4.15	2.1	1.21	0.23	0	0	0	0	0	3	1	0	0	0	0	0	0	0	0
38	0	20.3667	592	1.19	0	23	2	2	34.2	36.5	1	1	2	1	2	2	107	12.7	185	662	3.77	4.23	1.18	29.2	12.4	3.24	3.14	0.63	0.13	0	0	1	1	0	3	1	0	0	0	0	3	1	0	0
26	1	17	232	1.5	0	46	1	1	27.5	31.75	1	0	2	1	2	2	106	3.9	43	232	4.56	4.62	0.6	134.8	7.39	2.03	0.79	0.79	0.17	0	0	0	0	0	4	1	0	0	0	0	0	1	0	0
28	1	39.8333	319.667	1.48	0	30	2	2	34.8	37.7	1	0	2	2	1	2	84	6.28	166	307	4.02	3.06	1.21	35.8	18.1	2.88	2.33	0.97	0.25	0	1	1	1	1	4	1	0	0	0	0	2	1	0	0
28	0	411.833	330.286	1.4	0	47	1	1	40.9	35.85	1	1	2	2	2	2	140	4.1	60	274	3.85	3.42	0.66	119.1	10.7	3.64	1.77	0.8	0.22	0	1	1	0	0	4	1	0	0	0	0	0	0	0	0
29	1	159.083	307	0.28	1	47	1	1	46.2	48.45	2	0	2	2	2	2	141	5.13	64	429	4.64	3.68	0.7	125.8	15.6	3.77	1.27	0.99	0.18	0	1	0	0	1	4	1	0	0	0	0	3	1	0	0
30	0	44.3333	407.667	0.88	0	50	1	1	40.3	43.25	2	0	2	1	2	2	154	5.04	123	423	4.03	4.91	1.95	67.4	11.4	4.12	0.97	0.85	0.17	0	1	0	0	0	3	1	3	1	0	0	2	1	0	0
26	0	27	375.5	0.7	0	50	1	1	43.3	44.65	2	1	2	1	2	2	164	3.8	61	373	3.41	4.76	1.53	131	11.5	2.25	0.79	0.78	0.23	1	0	1	0	0	4	1	1	1	0	0	0	0	0	0
30	0	156.773	333	1.21	0	51	1	1	39	40	2	0	2	2	2	2	119	5.87	76	359	4.16	3.58	0.79	116.4	9.91	2.2	0.93	0.81	0.22	1	0	0	0	0	4	1	3	1	0	0	3	1	0	0
64	0	1.91	372.429	4.73	0	52	1	1	27.1	25.9	2	0	2	1	1	1	152	6.15	65	356	4.85	7.34	1.03	97.7	6.15	0.95	1.08	0.8	0.2	0	1	0	0	0	1	1	1	1	0	0	1	1	1	1
43	0	93	276	1.14	0	52	1	1	40.2	40.6	1	0	2	2	2	2	134	3.6	62	238	4.14	4.43	1.17	#NULL!	13.1	3.63	2.12	0.7	0.3	1	1	0	1	1	4	1	1	1	0	0	0	0	0	0
35	0	54.1333	266.5	5.98	0	54	1	1	29.5	38.25	1	0	2	2	1	1	125	4.5	77	237	4.39	6.06	0.8	86.2	10.7	3.2	1.2	1.19	0.29	1	1	0	1	1	3	1	2	1	0	0	3	1	0	0
46	1	107.889	252.5	0.77	1	54	1	1	38.9	39.95	1	0	2	1	2	2	127	4.1	77	252	4.88	4.12	1.77	79.8	14.3	2.75	1.65	1.1	0.3	1	1	0	0	1	3	1	0	0	0	0	3	1	0	0
40	0	2.1025	327.857	4.38	1	55	1	1	26.6	32.3	1	0	2	2	1	2	153	3.3	51	355	4.11	11.26	2.41	115.5	7.34	2.12	0.98	1.52	0.42	0	1	1	0	0	2	1	4	1	0	0	0	0	0	0
42	0	53	389.35	0.73	1	56	1	1	41.4	43.2	2	0	2	1	2	2	131	5.97	72	395.7	4.46	5.38	1.16	109.4	8.8	1.5	1.2	0.94	0.16	1	1	0	1	0	2	1	2	1	0	0	3	1	0	0
32	1	35.6667	457	0.17	1	56	1	1	38.1	41.05	2	0	2	1	2	2	150	4.4	82	444	4.32	4.56	1.23	108.6	9.12	1.7	1.32	1.06	0.14	1	0	0	0	0	4	1	3	1	0	0	4	1	0	0
41	0	106.455	308.414	0.39	1	57	1	1	41.3	43.15	1	0	2	1	2	2	128	4.12	67	315.2	4.99	5.94	0.86	97.8	10.5	2.47	0.88	1.01	0.18	1	1	1	0	0	3	1	2	1	0	0	4	1	0	0
26	0	37	417.533	0.74	0	58	1	1	39.9	40.95	2	0	2	1	2	2	144	5.17	110	396.6	4.29	5.18	0.9	79.4	9.2	2.1	0.9	0.77	0.23	1	1	1	0	1	3	1	0	0	0	0	4	1	0	0
38	0	17.6667	237.25	1.25	0	58	1	1	38.5	41.25	1	0	2	2	2	2	118	3.32	71	280	4.99	4.11	1.57	93.1	8.44	2.04	2.41	1.13	0.23	1	1	0	0	1	4	1	2	1	0	0	0	0	1	1
28	1	57.6	280.25	0.61	1	58	1	1	37.5	40.45	1	0	2	1	2	2	121	4.88	63	286.5	4.17	4.45	0.96	115.4	10.5	2.58	0.29	0.92	0.14	1	1	0	0	0	4	1	0	0	0	0	4	1	0	0
42	0	97.575	342	0.5	0	59	1	1	37.2	39.6	1	1	2	1	2	2	108	4.04	55	417	4.91	7.71	1.97	111.1	10	5.39	1.05	0.85	0.19	1	1	1	0	1	3	1	2	1	0	0	4	1	0	0
36	1	37.5	600.333	3.45	1	54	2	2	30.2	33.6	2	0	2	2	1	1	137	16.08	165	774	3.85	6.65	0.84	45.3	5.66	2.61	2	0.83	0.12	1	1	1	1	1	3	1	2	1	0	0	4	1	0	0
44	1	50	319.075	0.34	1	62	1	1	40.7	41.35	1	0	2	2	2	2	126	3.12	57	310.3	4.78	5.32	0.61	108.3	12.8	3.91	2.61	1.19	0.23	1	1	1	0	0	4	1	3	1	0	0	3	1	0	0
43	0	52.82	465.825	0.33	1	63	1	1	38.6	39.8	1	1	2	2	2	2	97	5.57	154	447.3	4.81	4.57	1.31	35.2	10.3	2.1	1.6	2.3	#NULL!	1	1	0	0	0	4	1	0	0	0	0	1	1	0	0
24	1	267.091	432.6	1.59	0	63	1	1	35.5	39.25	1	0	2	2	2	2	110	6.47	95	404.8	4.57	5.85	2.78	72.2	11.5	2.98	1.75	0.971	0.262	1	1	1	1	1	4	1	1	1	0	0	1	1	0	0
35	0	3.375	217.88	0.32	1	64	1	1	42.4	42.2	1	0	2	2	2	2	134	4	63	222.4	4.52	4.48	0.81	109.8	10.3	2.5	1.3	1.29	0.288	1	1	0	0	0	4	1	1	1	0	0	3	1	0	0
26	1	23.8571	229.857	0.14	1	64	1	1	41.8	43.8	1	0	2	2	2	2	137	2.7	45	251	4.34	3.73	1.66	132.8	13.9	3.53	1.01	0.942	0.165	1	0	1	0	0	4	1	1	1	0	0	4	1	0	0
38	0	3.625	517.667	3.09	0	31	2	2	41.2	43.1	2	1	2	1	2	2	150	8.3	134	469	6.3	5.4	2.48	57.5	8.28	4.97	0.86	1.04	0.211	1	1	1	1	0	4	1	0	0	0	0	4	1	0	0
27	1	61.4	627.286	4.09	0	32	2	1	29	36	1	1	2	2	2	2	78	18.45	340	728	5.9	6.28	1.51	15.1	7.43	2.94	0.37	0.913	0.207	0	1	0	1	0	3	1	0	0	0	0	0	0	0	0
30	0	65.6667	489.8	3.92	0	65	1	1	39.9	40.7	1	0	2	2	1	1	110	7.47	94	480.6	4.8	6.93	3.85	70.1	13.8	3.81	0.59	1.36	0.383	1	1	0	1	1	3	1	0	0	0	0	2	1	0	0
57	0	248	505.371	4.01	0	66	1	1	34.5	33.75	2	1	2	1	1	2	138	1.48	127	522.6	4.6	4.95	1.18	53.7	9.03	2.63	1	1.06	0.2	0	1	1	0	0	3	1	0	0	0	0	3	1	0	0
50	0	75	545.286	8.99	0	13	2	1	30.9	31.65	2	1	2	2	1	1	119	12.7	379	437	4.48	6.1	4.66	15	9.74	1.83	0.91	1.33	0.685	0	1	0	1	1	3	1	0	0	0	0	3	1	0	0
29	1	1815.25	495.386	1.75	1	39	2	2	37.8	40.4	1	0	2	2	2	2	106	10.17	102	402.7	4.46	5	1.84	64	14.2	3.62	1.3	0.995	0.242	0	1	0	0	0	3	1	3	1	0	0	2	1	0	0
27	1	222.833	196.2	1.04	1	67	1	1	31.2	33.6	1	0	2	1	2	2	127	3.03	45	203	4.47	4.72	0.55	131.9	9.49	2.18	0.81	0.834	0.123	0	1	1	0	0	4	1	2	1	0	0	2	1	0	0
33	0	86.7778	250.25	1.13	1	67	1	1	38	39	1	1	2	1	1	2	130	4.7	55	327	5.06	5.52	0.52	118.3	9.37	4.27	1.2	1.13	0.179	0	0	1	0	0	3	1	0	0	0	0	3	1	0	0
58	1	62.98	428.667	1.61	1	67	1	1	36.9	38.95	2	0	2	1	1	2	155	6.2	80	407	5.3	4.29	1.12	93.2	11.2	1.35	1.89	0.901	0.157	1	1	0	0	0	3	1	0	0	0	0	3	1	0	0
41	1	207.7	595	4.97	0	37	2	1	31.9	31.95	1	1	2	1	2	2	84	8.57	214	537	5.28	5.82	3.07	24	7.76	2.83	1.11	1.12	0.26	0	1	0	0	0	3	1	2	1	0	0	4	1	0	0
49	1	79.2857	388.233	0.58	1	68	1	1	36.2	40.1	1	1	2	1	1	1	103	5.94	74	423.4	3.82	4.43	1.52	82	11.7	3.55	2.06	0.97	0.16	1	0	1	0	1	2	1	0	0	0	0	1	1	0	0
43	1	246.375	455.625	5.49	1	42	2	2	30.3	36.15	2	1	1	1	2	2	126	3.53	120	376.5	4.38	4.15	1.25	63.4	10	3.2	1.3	1.16	0.396	1	1	1	1	0	3	1	2	1	0	0	2	1	0	0
45	0	75.6	415.45	0.59	1	69	1	1	43	42	2	1	2	1	2	2	130	5.2	90	394.8	5.33	5.39	1.98	88.6	9.99	3	0.35	0.872	0.309	1	1	0	0	1	3	1	0	0	0	0	3	1	0	0
60	0	1.36	324	3.63	1	71	1	1	17.3	31.15	2	0	2	2	1	2	130	10.86	98	393	4.25	10.63	2.83	71.9	10.4	2.85	1.01	1.18	0.184	0	0	0	0	0	2	1	1	1	0	0	0	0	0	0
41	1	178.6	209.1	1.95	0	71	1	1	33.4	37.2	1	0	2	1	1	1	156	3.97	50	213.3	5.94	6.88	2.16	115.4	5.97	2.08	1.11	0.756	0.156	1	1	1	0	1	4	1	2	1	0	0	3	1	0	0
35	0	36.6	354.58	2	1	71	1	1	35.6	39.3	1	0	2	2	1	1	113	4.76	65	404.9	4.87	5.43	1.25	105.8	9.66	4.11	1.94	1.13	0.294	1	1	1	0	1	4	1	2	1	0	0	1	1	0	0
35	1	13.76	545.771	1.24	0	45	1	2	40.3	37.15	2	1	2	1	1	1	117	5.7	98	446	4.46	4.82	1.52	85.7	9.8	3.5	1.2	1.39	0.218	1	1	0	0	0	4	1	1	1	0	0	3	1	0	0
36	0	76.5	224.533	0.18	1	72	1	1	43.2	43.1	1	1	2	1	2	2	131	3.37	53	246.6	4.27	4.88	0.7	117.3	14.7	2.71	2.96	1.01	0.204	1	1	1	0	0	4	1	2	1	0	0	4	1	3	1
30	1	962	502.2	1.11	0	45	2	2	41.7	41.35	1	0	2	1	2	2	108	7.05	139.6	464.2	5.21	4.44	2.1	43.5	14.4	2.39	0.72	1.16	0.2	1	1	0	0	1	4	1	2	1	0	0	2	1	0	0
47	0	63.6667	355.5	0.05	0	73	1	1	41.8	44.9	1	1	2	1	2	2	159	9.1	107	377	5.17	4.7	1.99	53.2	13.5	3.4	0.85	1.41	0.263	0	1	1	0	0	3	1	3	1	0	0	0	0	0	0
37	0	23	465	1.31	1	74	1	1	38.6	40.3	2	0	2	1	1	2	148	6.7	130	514	3.81	4.14	0.75	60.1	12	2.4	0.97	0.839	0.242	1	1	0	0	0	2	1	0	0	0	0	0	0	0	0
19	0	6.075	484.2	5.54	1	74	1	1	27.9	35.45	2	0	2	1	1	2	156	3.4	76	496	4.54	9.74	2.59	125.7	7.73	2.76	1.95	1.17	0.31	0	0	0	0	0	3	1	2	1	0	0	3	1	0	0
46	0	39.8333	411.4	0.21	0	74	1	1	37	39	2	0	2	1	2	2	170	4.9	92	425	4.95	4.08	0.85	85.6	10.8	2.89	0.7	0.959	0.214	0	0	1	0	0	3	1	0	0	0	0	2	1	0	0
33	0	13.25	275.3	0.42	1	74	1	1	47.7	45.85	1	0	2	2	1	1	134	4.94	55.7	275.6	4.47	4.49	0.62	117.8	18.9	3.38	3.74	0.874	0.221	1	0	1	0	1	4	1	1	1	0	0	0	0	0	0
33	1	172.4	332.25	0.23	1	75	1	1	38.1	38.05	1	0	2	2	2	2	124	3.07	67	335	4.42	3.93	0.57	103.4	12.8	4.23	1.48	0.947	0.203	0	0	0	0	0	4	1	2	1	0	0	4	1	0	0
38	0	18.9667	383.25	2.2	1	75	1	1	36.9	38.95	2	0	2	1	1	1	158	5.11	112.1	312	4.72	5.71	1.78	71.3	6.64	2.29	1.05	1.24	0.221	1	1	0	0	1	4	1	2	1	0	0	0	0	0	0
32	0	61.5	566.767	3.47	1	42	1	2	32.2	35.1	2	1	2	2	1	1	122	6.8	175.7	619.6	4.86	6.22	1.71	43.2	10.7	3.44	2.03	0.915	0.326	1	1	0	0	1	4	1	3	1	0	0	3	1	0	0
42	0	17.975	490.267	5.22	1	76	1	1	37.2	37.1	1	0	2	1	2	1	129	6.53	85.5	447.8	5.41	5.65	4.71	72.3	8.58	3.53	2.07	1.13	0.251	1	1	1	0	0	3	1	1	1	0	0	4	1	0	0
23	0	985.4	334.667	1.72	0	44	2	2	31.7	31.35	1	0	2	2	2	2	109	5.7	64	314	4.12	4.36	0.71	117.2	8.46	3.36	1.03	0.778	0.26	1	1	0	1	1	4	1	2	1	0	0	4	1	0	0
36	1	310.571	516.333	1.88	0	23	2	2	31.6	35.8	1	0	2	1	1	1	105	15.5	171	470	5.01	5.11	1.57	32.6	11.6	2.59	0.75	0.986	0.269	1	1	1	1	0	4	1	1	1	2	1	4	1	0	0
52	0	149.667	311.25	0.22	1	75	1	1	37.2	39.1	2	0	2	2	2	2	119	5.03	92.6	317.5	4.68	3.64	1.24	81.4	17	4.36	1.05	0.957	0.133	0	0	0	0	1	4	1	2	1	0	0	2	1	0	0
46	1	86	451.333	1.4	1	78	1	1	41.7	43.85	2	0	2	1	1	2	119	9.5	138	483	4.94	4.7	1.34	52.4	18	5.92	0.58	1.4	0.312	0	1	1	0	0	4	1	0	0	0	0	4	1	0	0
24	0	48	266.433	0.14	1	78	1	1	46.7	43.35	1	0	2	1	2	2	114	5	51.5	303.3	5.74	4.12	0.4	128.8	1.2	2.36	1.22	0.959	0.157	1	0	0	0	0	4	1	1	1	0	0	1	1	0	0
56	1	0.655	336.767	9.42	1	79	1	1	22.8	35.4	2	0	2	1	1	1	143	7.74	86.7	356.6	5.5	9.43	3.13	85.8	6.26	2.68	0.9	1.43	0.327	1	1	1	0	0	4	1	3	1	0	0	3	1	0	0
24	1	398.75	233.15	0.58	0	44	1	2	37.4	35.2	1	0	2	1	1	1	115	4.25	49.8	209.3	4.6	4.32	0.61	130.3	8.9	1.7	0.8	0.814	0.201	1	1	1	1	0	4	1	2	1	0	0	3	1	0	0
43	1	46.4286	474.15	0.61	1	79	1	1	51.5	49.25	2	0	2	1	1	1	132	8.8	128.2	480.9	5.4	5.53	2.53	58.6	8.9	2	1.2	0.991	0.228	1	0	1	0	0	4	1	3	1	0	0	0	0	0	0
47	0	44.2	399.8	4.37	0	80	1	1	35	40	2	1	1	1	2	1	133	4.27	89	370	6.07	3.65	1.46	88.5	6.27	3.57	1.22	1.31	0.309	1	1	0	0	0	4	1	0	0	0	0	4	1	0	0
29	1	61.25	555.614	1.47	0	44	2	2	39.4	40.2	2	1	2	1	1	2	154	6.98	159.1	437.3	4.42	4.67	1.13	49.8	9.31	2.75	0.55	1.02	0.261	1	1	1	1	0	2	1	3	1	0	0	1	1	0	0
23	0	9	559.85	0.53	1	80	1	1	43.7	45.85	2	0	2	2	2	2	128	3.82	68.8	639.7	4.89	6	0.87	127.3	10.5	2.08	0.34	1.12	0.266	1	0	1	0	0	3	1	0	0	0	0	3	1	0	0
39	0	58.2	285.583	1.5	0	81	1	1	37.3	37.15	1	0	2	1	1	2	111	3.55	66.5	279.5	4.57	3.57	3.02	100	9.5	2.5	0.6	0.941	0.176	1	1	1	0	1	4	1	1	1	0	0	0	0	0	0
27	1	37.6667	312.25	0.88	0	82	1	1	39.1	40.55	1	0	2	2	2	2	125	4.23	66.7	313.5	4.25	5.81	0.91	108.4	11.8	2.78	1.56	1.06	0.231	1	1	0	0	0	4	1	1	1	1	1	3	1	1	1
23	1	31.5	393.057	1.03	1	83	1	1	43.1	42.05	2	0	2	1	2	2	141	5.94	107.3	459.4	4.24	4.51	0.86	83.6	12.6	2.96	1.19	1.17	0.3	1	1	0	0	0	4	1	0	0	0	0	2	1	0	0
28	0	30.18	402.35	1.2	0	84	1	1	38.8	40.9	2	0	2	1	1	2	142	3.29	84.2	411.4	4.4	4.32	2.26	108.2	9.34	3.05	0.93	1.26	0.365	1	1	0	0	1	4	1	3	1	0	0	4	1	0	0
29	1	6.96667	419.54	0.49	1	84	1	1	41.8	41.4	2	0	2	1	1	2	139	7.59	144.4	538.7	4.61	5.7	0.71	55.9	9.46	3.77	0.73	0.79	0.199	1	1	0	0	0	3	1	0	0	2	1	0	0	0	0
38	1	68.58	307.125	2.03	1	84	1	1	30.4	34.2	1	0	2	1	2	2	125	5.09	78.1	332.5	5.08	4.38	1.45	82.9	10.3	2.4	0.87	1.06	0.67	0	0	0	0	0	3	1	0	0	0	0	0	0	0	0
35	0	18.6	348.367	0.43	1	85	1	1	40.7	42.85	1	0	2	1	2	2	131	2.78	53	460.2	4.65	2.77	2.02	118.1	13.5	3.68	1.98	1.39	0.315	1	1	1	0	0	3	1	0	0	2	1	0	0	0	0
46	1	7.7	435.975	1.16	1	86	1	1	39.6	41.8	1	0	2	1	1	1	109	5.77	118.1	434.9	5.08	3.7	6.28	47.6	16.9	4.17	1.04	0.937	0.162	1	1	1	0	1	3	1	0	0	0	0	1	1	0	0
25	1	52.6667	191.5	0.56	1	86	1	1	41.5	43.25	1	0	2	2	2	2	136	3.61	50	230.5	4.14	4.24	0.47	129.2	9.69	2.95	1.49	0.865	0.183	1	1	1	0	1	4	1	0	0	0	0	2	1	0	0
46	0	61.6667	472.386	5.59	1	86	1	1	30.2	35.1	2	1	2	2	1	1	107	8.98	218.9	688.7	4.47	5.75	2.68	30	5.66	2.22	0.67	1.21	0.331	1	1	0	0	1	4	1	2	1	0	0	3	1	0	0
31	0	1.43333	260.72	0.82	1	87	1	1	44.8	45.9	1	0	2	1	2	2	133	5.23	41.1	250.6	4.62	4.73	0.63	132.1	10.2	2.1	0.7	0.976	0.266	1	0	0	0	0	3	1	0	0	2	1	2	1	3	1
56	0	103.667	412.833	3.86	1	88	1	1	17	28.5	2	1	2	1	1	2	128	6.74	81.9	408	5.66	6.64	2.28	91.9	6.4	3.13	0.79	1.04	0.38	1	0	0	0	0	2	1	2	1	0	0	1	1	1	1
29	1	32	348.867	0.09	0	88	1	1	37.6	38.3	1	0	2	2	2	2	126	4.8	48.3	340.6	4.74	4.28	0.75	127	13.2	2.61	1.49	0.695	0.194	1	0	0	0	0	3	1	1	1	0	0	1	1	0	0
29	1	15.75	305.175	2.17	1	89	1	1	44.7	42.85	1	0	2	1	1	1	98	3.68	70.1	323.7	5.02	5.12	1.46	100.7	11.7	3.26	2.84	0.9	0.21	1	1	1	0	1	4	1	0	0	2	1	2	1	0	0
23	0	0.2	436.433	1.49	1	89	1	1	42	43.5	2	1	2	1	1	1	142	3.31	67	449.3	4.33	5.39	0.94	128.7	12.2	3.68	1.3	1.07	0.185	1	0	0	0	0	2	1	2	1	0	0	4	1	0	0
28	0	33	447.14	2.142	1	90	1	1	40.5	37.25	1	0	2	1	1	2	126	4.1	78.8	355.7	4.97	6.66	0.83	88	12.7	2.54	1.56	1.32	0.301	1	1	1	0	1	4	1	1	1	0	0	3	1	0	0
50	1	148.222	376.467	6.43	1	89	1	1	27.3	31.15	2	0	2	1	1	2	130	5.04	106	350.8	5.77	4.05	2.34	70.1	6.96	1.93	0.35	1.25	0.35	1	1	0	0	1	4	1	1	1	0	0	1	1	0	0
44	0	86.725	278.475	0.13	1	91	1	1	43.4	46.2	1	0	2	2	2	2	93	6.6	60.7	276.9	5.23	4.27	2.19	106	7.8	2.4	0.4	1.02	0.21	1	1	1	0	1	4	1	0	0	2	1	3	1	0	0
31	1	415.5	249.75	1.38	1	91	1	1	38.9	41.45	1	0	2	1	1	2	109	4.95	54	230	4.31	4.42	0.72	120.7	15.5	3.98	1.82	0.961	0.239	1	1	1	0	0	4	1	2	1	0	0	3	1	0	0
34	1	1.225	328.375	1.58	1	92	1	1	40	42.5	1	0	2	1	1	2	111	6.32	59	329.5	3.97	5.28	1.13	114.8	8.7	3.46	1.26	0.89	0.151	1	0	0	0	0	4	1	0	0	0	0	4	1	0	0
41	1	102	338.125	0.36	1	93	1	1	38.9	40.95	1	0	2	2	1	1	92	4.43	63	345.5	4.66	5.82	1.2	105.3	14.2	3.29	1.34	1.1	0.498	1	0	0	0	1	4	1	3	1	0	0	4	1	0	0
32	1	72.2857	336.72	0.2	0	91	1	2	40.3	41.15	1	0	2	2	2	2	132	2.33	51.6	267.6	4.74	3.24	1.08	121.7	14.4	4.25	1.2	0.896	0.283	1	0	0	0	0	3	1	1	1	0	0	2	1	0	0
30	0	3.5	193.267	0.04	1	94	1	1	42.8	45.9	2	1	2	1	1	1	152	4.46	80.3	182.6	4.12	5.55	1.16	112.9	14.7	3.36	1.83	1.03	0.305	1	1	0	0	0	4	1	1	1	0	0	2	1	0	0
20	0	35	308.94	1.34	1	94	1	1	13.5	29.25	2	0	2	2	1	2	165	5.65	94.1	318.7	4	7.42	0.92	100	4.56	3.47	0.95	0.996	0.199	1	0	1	0	0	4	1	2	1	0	0	3	1	1	1
40	1	8	272.9	0.3	1	96	1	1	41	42	2	0	2	1	1	1	107	4.12	66.3	275.8	3.58	4.26	0.84	114.7	10.2	2.53	2.4	0.902	0.168	1	1	0	0	0	4	1	0	0	0	0	4	1	0	0
23	1	61	409.34	0.48	1	98	1	1	41.9	44.95	2	0	2	1	2	2	138	5.97	49.5	495.7	4.63	3.51	0.84	145.8	11.4	3.17	0.68	0.972	0.209	1	0	0	0	0	4	1	0	0	0	0	2	1	0	0
23	0	33.3333	385.4	0.08	1	98	1	1	43.7	42.35	2	1	2	1	1	2	139	4.25	77.4	373.8	4.88	2.55	1.35	121.3	12.6	2.13	0.97	0.968	0.099	1	1	1	0	1	4	1	2	1	3	1	2	1	0	0
46	0	13.725	458	0.21	0	100	1	1	44.9	42.95	2	1	2	1	2	2	134	6.67	120.7	445	5.34	5.95	0.91	61.7	9.06	3.51	0.9	0.958	0.227	1	1	0	0	0	4	1	0	0	0	0	2	1	0	0
36	0	12.4	269.5	0.2	1	103	1	1	41.7	43.85	1	0	2	1	1	2	131	4.69	67.4	224	3.92	3.98	0.55	90.5	10.7	3.79	0.167	0.886	0.129	1	1	1	0	0	4	1	2	1	1	1	4	1	1	1
27	0	33.6667	401.475	2.19	1	104	1	1	21.7	30.85	2	0	2	1	1	2	149	6.2	79.6	328.9	4.24	8.02	1.6	116.6	5.18	3.71	1.3	1.11	0.222	1	0	1	0	1	4	1	2	1	0	0	3	1	0	0
25	0	0.433333	356.98	3.45	1	105	1	1	36.1	38.05	1	0	2	2	1	1	96	11.06	306.4	489.9	4.25	4.94	1.55	17.4	9.51	2.92	2.36	1.09	0.44	0	1	0	0	0	4	1	2	1	0	0	4	1	0	0
28	0	2.72	436.143	1.22	1	107	1	1	43.3	44.15	2	1	2	1	2	2	154	5.51	86.3	435	4.81	5.77	1.89	105	10.2	4.08	0.87	1.4	0.31	1	1	1	0	0	2	1	2	1	0	0	3	1	2	1
40	1	2.5	460.8	0.43	1	107	1	1	38.2	42.1	2	0	2	1	2	1	145	4.15	97.8	484.2	4.69	4.52	1.77	82.9	13.7	5.18	1.73	1.23	0.4	1	1	1	0	0	3	1	2	1	0	0	2	1	0	0
45	0	4	326.15	0.2	1	107	1	1	43.6	45.3	2	0	2	2	2	2	148	6.28	88.1	326.6	5.13	5.21	1.97	90.9	11.2	2.74	1.15	1.01	0.216	0	0	0	1	1	4	1	0	0	0	0	1	1	0	0
